# Supplementary material
Source: MDPI journal article supplement (https://www.mdpi.com/2073-4441/13/20/2926)
Supplement: s1 [file s1]

**Table S1. The CN Lookup attributes**

| Land use values | Description  | HSG A | HSG B | HSG C | HSG D |
|-----------------|--------------|-------|-------|-------|-------|
| 1               | Forest       | 37    | 60    | 73    | 80    |
| 2               | Grassland    | 49    | 69    | 79    | 84    |
| 3               | Cropland     | 71    | 81    | 87    | 90    |
| 4               | Built-up     | 61    | 75    | 83    | 87    |
| 5               | Wetlands     | 10    | 10    | 10    | 10    |
| 6               | Water bodies | 10    | 10    | 10    | 10    |

**Table S2. Estimation of loss and transform model parameter values for calibration**

| No          | SB           | CN            | S            | I <sub>a</sub> | T <sub>Lag</sub> (min) |
|-------------|--------------|---------------|--------------|----------------|------------------------|
| 1           | W1230        | 81.412        | 57.91        | 11.58          | 58.8                   |
| 2           | W1140        | 85.488        | 42.92        | 8.58           | 96.6                   |
| 3           | <b>W960*</b> | 83.516        | 50.13        | 10             | 68.4                   |
| 4           | W1290        | 86.156        | 40.64        | 8.13           | 66.6                   |
| 5           | W900         | 86.792        | 38.61        | 7.72           | 57                     |
| 6           | W720         | 82.778        | 52.83        | 10.57          | 75.6                   |
| 7           | W870         | 84.935        | 44.96        | 8.99           | 87.6                   |
| 8           | W690         | 85.293        | 43.69        | 8.74           | 80.4                   |
| <b>Mean</b> | -            | <b>84.538</b> | <b>46.45</b> | <b>9.29</b>    | <b>73.88</b>           |

**Table S3. Initial values of calibration parameters for reaches**

| Reach name   | length (m) | slope    | Muskingum coefficients (K and X) |       |
|--------------|------------|----------|----------------------------------|-------|
| R20          | 1179.8     | 0.011036 | 0.09                             | 0.48  |
| R60          | 18265.3    | 0.01188  | 1.34                             | 0.499 |
| R80          | 3056.2     | 0.004254 | 0.3                              | 0.48  |
| R90          | 7000.9     | 0.018712 | 0.44                             | 0.498 |
| R110         | 4507.5     | 0.010871 | 0.33                             | 0.496 |
| R130         | 2857.6     | 0.003849 | 0.29                             | 0.47  |
| R160         | 11293.9    | 0.00425  | 1.13                             | 0.494 |
| R170         | 462.2      | 0.015257 | 0.03                             | 0.474 |
| R190         | 13384.8    | 0.001793 | 1.7                              | 0.485 |
| R290         | 16709.7    | 0.00377  | 1.7                              | 0.495 |
| R330         | 6998.2     | 0.001143 | 1.02                             | 0.45  |
| R380         | 25294.1    | 0.000672 | 4.38                             | 0.471 |
| R410         | 21476.6    | 0.000792 | 3.41                             | 0.473 |
| R420         | 6137.6     | 0.016782 | 0.4                              | 0.498 |
| <b>R440*</b> | 736.9      | 0.002714 | 0.08                             | 0.34  |

|             |         |          |             |             |
|-------------|---------|----------|-------------|-------------|
| R450        | 37835.8 | 0.002432 | 4.5         | 0.496       |
| R470        | 4826.7  | 0.007459 | 0.39        | 0.43        |
| R490        | 4964.4  | 0.004029 | 0.5         | 0.486       |
| R500        | 1403.6  | 0.04346  | 0.07        | 0.497       |
| R520        | 5888.6  | 0.004585 | 0.56        | 0.49        |
| R540        | 11562.7 | 0.000865 | 1.84        | 0.453       |
| R590        | 11966.4 | 0.000501 | 2.28        | 0.41        |
| R650        | 36844.8 | 0.016882 | 2.42        | 0.499       |
| <b>Mean</b> | -       | -        | <b>1.27</b> | <b>0.47</b> |

\* sub-basin and reach at the outlet

**Table S4. Time of streamflow peak for each event**

| <b>Events</b> | <b>Start and End date</b> | <b>Time to peak</b> |
|---------------|---------------------------|---------------------|
| 1             | LR: 21/03 - 18/05/2011    | 07 April 2011       |
| 2             | SR: 06/09 - 15/11/2011    | 20 October 2011     |
| 3             | LR: 10/03 - 27/05/2012    | 25 April 2012       |
| 4             | SR: 13/09 - 19/11/2012    | 08 November 2012    |
| 5             | LR: 15/03 - 12/05/2013    | 07 May 2013         |
| 6             | SR: 09/09 - 13/11/2013    | 19 October 2013     |
| 7             | LR: 11/03 - 14/05/2014    | 07 May 2014         |
| 8             | SR: 12/09 - 15/11/2014    | 11 October 2014     |
| 9             | LR: 20/03 - 18/05/2015    | 14 May 2015         |
| 10            | SR: 23/09 - 22/11/2015    | 11 October 2014     |
| 11            | LR: 24/03 - 22/05/2016    | 13 April 2016       |
| 12            | SR: 12/09 - 15/11/2016    | 11 November 2016    |
| 13            | LR: 12/03 - 14/05/2017    | 28 March 2017       |
| 14            | SR: 18/09 - 23/11/2017    | 19 October 2017     |
| 15            | LR: 10/03 - 12/05/2018    | 23 March 2018       |
| 16            | SR: 13/09 - 15/11/2018    | 08 November         |
